# Supplementary material
Source: PubMed Central journal article supplement (PMC2868363)

Supplementary figure 1 Konietzko et al.

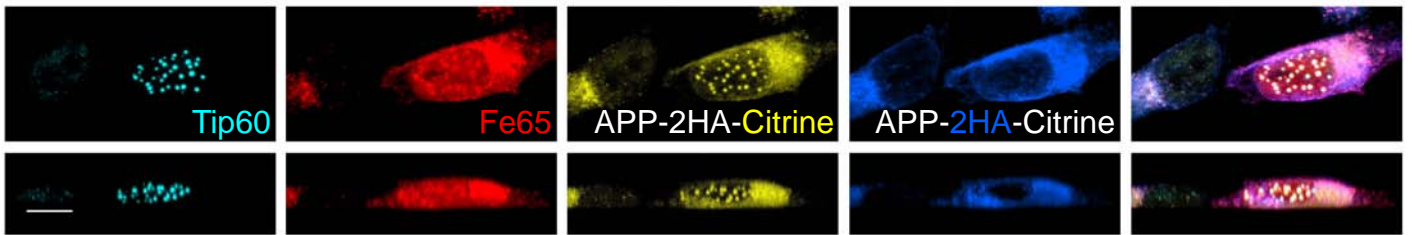

Supplementary figure 2 Konietzko et al.

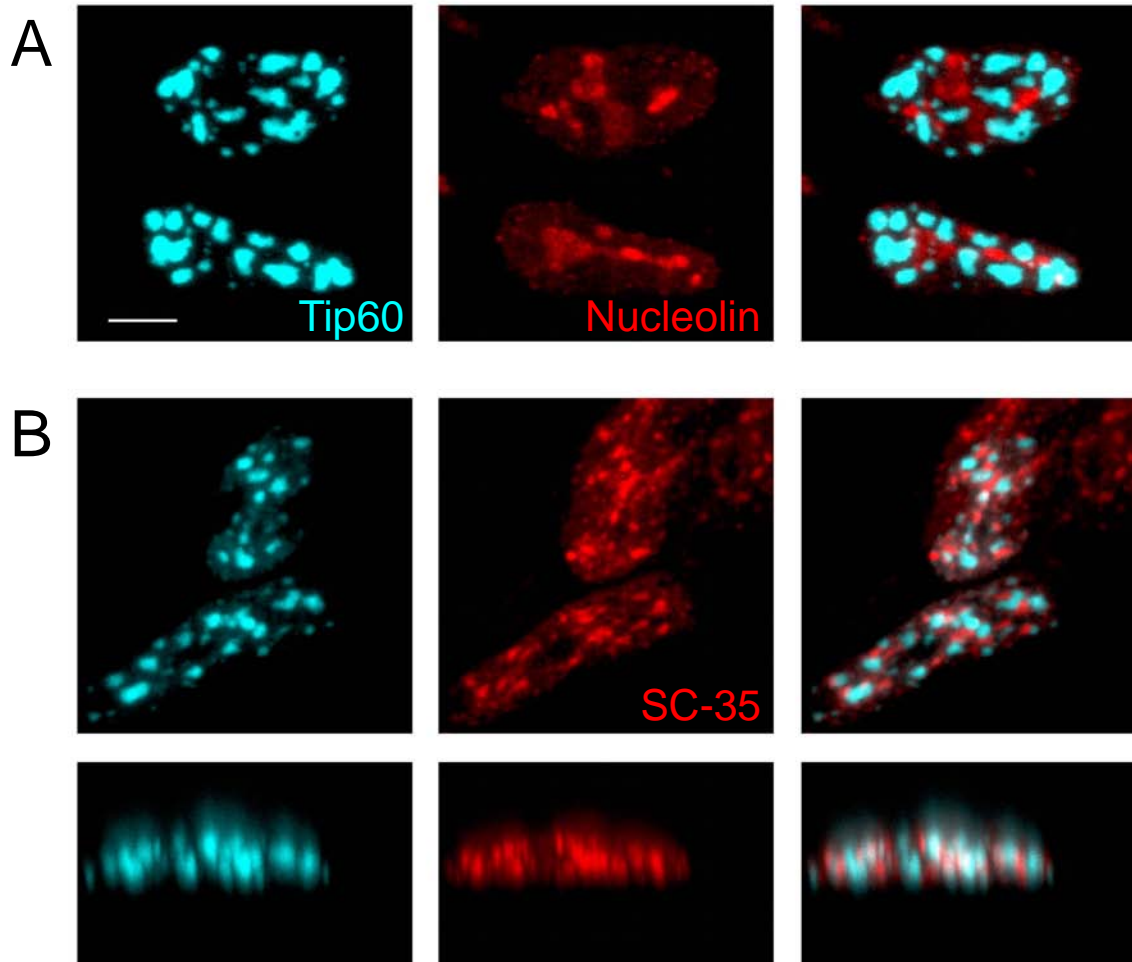

Supplement: NIHMS137071-supplement-1.pdf [file NIHMS137071-supplement-1.pdf]
